# Supplementary material for: Structural Brain Correlates of Attention Dysfunction in Lewy Body Dementias and Alzheimer’s Disease
Source: PubMed Central journal article supplement (PMC6251343; doi:10.3389/fnagi.2018.00347), 2018-10-30
Supplement: Data_Sheet_1.pdf [file Data_Sheet_1.pdf]

## *Supplementary Material*

### **Structural brain correlates of attention dysfunction in Lewy body dementias and Alzheimer's disease**

**Ruth Cromarty<sup>1†</sup>, Julia Schumacher<sup>1†\*</sup>, Sara Graziadio<sup>2</sup>, Peter Gallagher<sup>3</sup>, Alison Killen<sup>1</sup>, Michael J. Firbank<sup>1</sup>, Andrew Blamire<sup>4</sup>, Marcus Kaiser<sup>1,5</sup>, Alan J. Thomas<sup>1</sup>, John T. O'Brien<sup>6</sup>, Luis R. Peraza<sup>1,5</sup> and John-Paul Taylor<sup>1</sup>**

\* **Correspondence:** Julia Schumacher, [j.a.schumacher2@newcastle.ac.uk](mailto:j.a.schumacher2@newcastle.ac.uk)

#### **Contents**

|   |                                                         |    |
|---|---------------------------------------------------------|----|
| 1 | Comparison of DLB and PDD subgroups.....                | 2  |
| 2 | Analysis of error rates .....                           | 4  |
| 3 | Clinical correlations in AD and LBD.....                | 6  |
| 4 | Results from VBM analysis .....                         | 7  |
| 5 | Effect of dopaminergic medication in the LBD group..... | 12 |
| 6 | Analysis of matched dementia subgroups .....            | 13 |
| 7 | Supplementary references .....                          | 15 |

## 1 Comparison of DLB and PDD subgroups

Supplementary Table S1: Demographic and clinical comparison of DLB and PDD patients.

|              | DLB (N=25)  | PDD (N=20)              | Between-group differences    |
|--------------|-------------|-------------------------|------------------------------|
| Male: female | 19:6        | 19:1                    | $\chi^2=3.05$ , $p=0.08^a$   |
| Age          | 76.1 (6.2)  | 72.6 (5.9)              | $t_{43}=1.95$ , $p=0.06^c$   |
| AChEI        | 23          | 16                      | $\chi^2=1.39$ , $p=0.24^a$   |
| PD meds      | 13          | 20                      | $\chi^2=13.09$ , $p<0.001^a$ |
| Duration     | 3.6 (2.4)   | 2.6 (1.5)               | $U=1.14$ , $p=0.29^b$        |
| MMSE         | 23.0 (4.2)  | 23.7 (3.2)              | $t_{43}=0.54$ , $p=0.60^c$   |
| CAMCOG       | 74.5 (14.7) | 77.7 (9.3)              | $t_{43}=0.85$ , $p=0.40^c$   |
| UPDRS        | 15.6 (7.2)  | 26.6 (7.9)              | $t_{43}=4.86$ , $p<0.001^c$  |
| CAF total    | 4.00 (4.4)  | 6.6 (4.3) <sup>d</sup>  | $t_{41}=1.89$ , $p=0.07^c$   |
| Mayo total   | 12.3 (6.2)  | 15.2 (5.0) <sup>d</sup> | $t_{41}=1.67$ , $p=0.10^c$   |
| Mayo cogn    | 2.2 (1.8)   | 3.7 (1.8) <sup>d</sup>  | $t_{41}=2.59$ , $p=0.01^c$   |
| NPI total    | 9.1 (4.9)   | 18.8 (11.6)             | $t_{43}=3.78$ , $p<0.001^c$  |
| NPI hall     | 1.4 (1.7)   | 2.2 (2.2)               | $t_{43}=1.37$ , $p=0.18^c$   |

AChEI, number of patients taking acetylcholinesterase inhibitors; CAF total, Clinical Assessment of Fluctuations total score; CAMCOG, Cambridge Cognitive Examination; DLB, Dementia with Lewy bodies; Duration, duration of cognitive symptoms in years; Mayo total, Mayo Fluctuations Scale; Mayo cognitive, Mayo Fluctuation cognitive subscale; Mayo arousal, Mayo Fluctuations arousal subscale; MMSE, Mini Mental State Examination; PDD, Parkinson's disease dementia; PD meds, number of patients taking dopaminergic medication; UPDRS, Unified Parkinson's Disease Rating Scale; NPI, Neuropsychiatric Inventory; NPI hall, NPI hallucination subscore

<sup>a</sup> Chi-square test DLB, PDD; <sup>b</sup> Mann Whitney U test DLB, PDD; <sup>c</sup> Student's t-test DLB, PDD; <sup>d</sup> N=18.

Supplementary Table S2: Mean reaction times, error rates, and ANT effects for DLB and PDD subgroups (standard deviations are presented in brackets). Comparison between groups using independent samples t-tests.

|                     | DLB (N=25)     | PDD (N=20)     | Between-group differences |
|---------------------|----------------|----------------|---------------------------|
| Mean RT             | 1483.6 (382.3) | 1651.7 (391.0) | $t_{43}=1.45$ , $p=0.15$  |
| Mean error rate (%) | 14.2 (8.4)     | 12.2 (10.0)    | $t_{43}=0.74$ , $p=0.47$  |
| Alerting            |                |                |                           |
| Raw RT              | 10.9 (87.7)    | -11.2 (101.7)  | $t_{43}=0.78$ , $p=0.44$  |
| Normalised RT       | 0.01 (0.06)    | -0.0006 (0.05) | $t_{43}=0.65$ , $p=0.52$  |
| Orienting           |                |                |                           |
| Raw RT              | 85.0 (98.8)    | 82.5 (131.1)   | $t_{43}=0.07$ , $p=0.94$  |
| Normalised RT       | 0.06 (0.06)    | 0.05 (0.07)    | $t_{43}=0.19$ , $p=0.85$  |
| Executive           |                |                |                           |
| Raw RT              | 548.9 (281.6)  | 596.7 (219.4)  | $t_{43}=0.62$ , $p=0.54$  |
| Normalised RT       | 0.35 (0.12)    | 0.36 (0.10)    | $t_{43}=0.32$ , $p=0.75$  |

DLB, dementia with Lewy bodies; PDD, Parkinson's disease dementia; RT, reaction time

## 2 Analysis of error rates

Supplementary Table S3: Mean error rates (%) for each task condition (cue x target), for the controls, AD and LBD patients. Standard deviations are presented in brackets

|                      |             | HC (n=22)   | AD (n=31)   | LBD (n=45)  |
|----------------------|-------------|-------------|-------------|-------------|
| Mean error rates (%) |             |             |             |             |
| All trials           |             | 1.8 (1.7)   | 9.7 (8.6)   | 13.3 (9.1)  |
| No Cue               | Overall     | 1.9 (2.4)   | 9.8 (7.5)   | 14.1 (10.3) |
|                      | Congruent   | 1.1 (2.1)   | 4.3 (6.0)   | 5.8 (6.0)   |
|                      | Incongruent | 2.8 (3.8)   | 15.3 (11.6) | 22.4 (17.5) |
| Neutral              | Overall     | 2.1 (1.8)   | 9.5 (9.1)   | 12.8 (9.1)  |
|                      | Congruent   | 1.1 (1.5)   | 5.4 (5.8)   | 7.6 (8.1)   |
|                      | Incongruent | 3.1 (2.6)   | 13.7 (13.4) | 18.0 (14.2) |
| Spatial              | Overall     | 1.5 (1.8)   | 9.8 (9.9)   | 13.0 (9.5)  |
|                      | Congruent   | 0.7 (1.7)   | 5.2 (7.6)   | 6.4 (7.5)   |
|                      | Incongruent | 2.3 (2.5)   | 14.5 (15.0) | 19.6 (14.2) |
| Congruent            | Overall     | 0.9 (1.5)   | 4.9 (6.0)   | 6.6 (6.2)   |
| Incongruent          | Overall     | 2.7 (2.4)   | 14.5 (12.8) | 20.0 (14.3) |
| ANT effects (%)      |             |             |             |             |
| Alerting             |             | -0.2 (2.2)  | 0.2 (3.5)   | 1.3 (3.5)   |
| Orienting            |             | 0.6 (1.3)   | -0.3 (3.7)  | -0.3 (3.7)  |
| Executive            |             | 1.78 (2.1)* | 9.7 (10.2)* | 9.6 (10.2)* |

AD, Alzheimer's disease; HC, healthy controls; LBD, Lewy body dementia;

\*Significant ANT effect, p-value < 0.05 for error rates

Supplementary Table S4: Results from statistical tests for error rates. Repeated measures (cue x target) ANOVA effects with group (HC, AD, LBD) as between-subject factor (F value, degrees of freedom (df), error df, and p-value), and post-hoc tests (95% confidence interval, Bonferroni-corrected p-value).

|                         |           | Effect significance, error rates |
|-------------------------|-----------|----------------------------------|
| Main effects            |           |                                  |
| A) Group                |           | F(2,95)=15.59, p<0.001           |
| Post-hoc                | HC-AD     | [-13.3, -2.5], p=0.002           |
|                         | HC-LBD    | [-16.5, -6.5], p<0.001           |
|                         | AD-LBD    | [-8.1, 0.9], p=0.17              |
| B) Cue                  |           | F(1.8,172.4)=0.67, p=0.51        |
| C) Target               |           | F(1,95)=57.70, p<0.001           |
| D) Cue x group          |           | F(3.6,172.4)=0.65, p=0.63        |
| Interactions            |           |                                  |
| E) Target x group       |           | F(2,95)=9.38, p<0.001            |
| HC                      | Executive | F(1,21)=15.98, p=0.001           |
| AD                      | Executive | F(1,30)=27.10, p<0.001           |
| LBD                     | Executive | F(1,44)=51.82, p<0.001           |
| F) Cue x target         |           | F(1.9,176.2)=3.87, p=0.02        |
| G) Cue x target x group |           | F(3.7,176.2)=1.76, p=0.14        |

AD, Alzheimer's disease; HC, healthy controls; LBD, Lewy body dementia

Supplementary Table S5: Comparison of magnitude of ANT effects between the groups for error rates using univariate ANOVAs with ANT effect as dependent variable and group as fixed factor (F value, degrees of freedom (df), error df, and p-value) and post-hoc tests (95% confidence interval, Bonferroni-corrected p-value).

| Effect significance, error rates |                               |
|----------------------------------|-------------------------------|
| A) alerting                      |                               |
| ANOVA                            | F(2,95)=0.79, p=0.46          |
| B) orienting                     |                               |
| ANOVA                            | F(2,95)=0.44, p=0.65          |
| C) executive                     |                               |
| ANOVA                            | F(2,95)=9.38, p<0.001         |
| Post-hoc                         | HC-AD [-14.8, -0.8], p=0.02   |
|                                  | HC-LBD [-18.1, -5.1], p<0.001 |
|                                  | AD-LBD [-9.6, 2.0], p=0.35    |

AD, Alzheimer's disease; HC, healthy controls; LBD, Lewy body dementia

### 3 Clinical correlations in AD and LBD

Supplementary Table S6: Pearson's correlations between clinical scores and ANT effects using normalized and raw RT in the dementia groups. Correlation value (uncorrected p-value, p-value FDR-corrected for multiple comparisons). Correlations surviving FDR-correction are marked with an asterisk.

|            |                        | Raw reaction time    | Normalized reaction time |
|------------|------------------------|----------------------|--------------------------|
| <b>AD</b>  |                        |                      |                          |
| Mean RT    | MMSE                   | -0.54 (0.002, 0.04)* | /                        |
|            | CAMCOG                 | -0.54 (0.002, 0.04)* | /                        |
| Alerting   | CAMCOG                 | -0.38 (0.036, 0.26)  | -0.23 (0.20, 0.60)       |
| Orienting  | CAMCOG                 | 0.36 (0.046, 0.26)   | 0.43 (0.02, 0.32)        |
| <b>LBD</b> |                        |                      |                          |
| Mean RT    | UPDRS                  | 0.39 (0.008, 0.13)   | /                        |
|            | Mayo cogn <sup>a</sup> | 0.33 (0.03, 0.26)    | /                        |
| Alerting   | MMSE                   | 0.29 (0.055, 0.26)   | 0.31 (0.04, 0.32)        |
|            | Mayo total             | -0.28 (0.07, 0.26)   | -0.32 (0.03, 0.32)       |
|            | Mayo cogn <sup>a</sup> | -0.33 (0.03, 0.26)   | -0.35 (0.02, 0.32)       |

AD, Alzheimer's disease; CAMCOG, Cambridge Cognitive Examination; LBD, Lewy body dementia; Mayo cogn, Mayo Fluctuations cognitive subscale; Mayo total, Mayo Fluctuations Scale; MMSE, Mini Mental State Examination; NPI hall, Neuropsychiatric Inventory hallucination subscore; RT, reaction time; UPDRS, Unified Parkinson's Disease Rating Scale  
<sup>a</sup>N=43

#### 4 Results from VBM analysis

Supplementary Table S7: Correlations between ANT effects (normalized RT) and grey matter (GM) and white matter (WM) volume in AD. All clusters are significant at  $p < 0.001$ , uncorrected. Correction for multiple comparisons was performed using Monte-Carlo simulations with AlphaSim at  $p < 0.05$  resulting in minimum cluster sizes of 257 (GM) and 258 (WM) voxels. No cluster survived correction. Locations were estimated from the Harvard-Oxford atlas in FSL and WM regions were identified from the nearest GM structure.

| Grey matter                     |      |                | White matter               |      |                |
|---------------------------------|------|----------------|----------------------------|------|----------------|
| Cluster location                | size | MNI<br>(X,Y,Z) | Cluster location           | size | MNI<br>(X,Y,Z) |
| Alerting, negative correlation  |      |                |                            |      |                |
| R postcentral gyrus             | 127  | 66,-10,15      | No significant clusters    |      |                |
| L anterior supramarginal        | 101  | -52,-27,38     |                            |      |                |
| L anterior supramarginal        | 41   | -60,-34,45     |                            |      |                |
| R posterior supramarginal       | 8    | 68,-42,15      |                            |      |                |
| R frontal orbital cortex        | 2    | 24,30,-26      |                            |      |                |
| Alerting, positive correlation  |      |                |                            |      |                |
| No significant clusters         |      |                | L lateral occipital cortex | 67   | -38,-64,34     |
|                                 |      |                | R lateral occipital cortex | 14   | 44,-63,9       |
|                                 |      |                | R lateral occipital cortex | 2    | 33,-86,9       |
|                                 |      |                | R angular gyrus            | 2    | 44,-56,30      |
|                                 |      |                | L temporal fusiform        | 1    | -39,-32,-18    |
|                                 |      |                | L precuneus                | 1    | -10,-54,60     |
| Orienting, negative correlation |      |                |                            |      |                |
| No significant clusters         |      |                | No significant clusters    |      |                |
| Orienting, positive correlation |      |                |                            |      |                |
| R posterior middle temporal     | 74   | 68,-26,-12     | R inferior temporal gyrus  | 95   | 56,-39,-18     |
| R occipital pole                | 33   | 33,-92,20      | R temporal occipital       | 10   | 34,-56,0       |
| R superior lateral occipital    | 3    | 21,-60,64      | L middle temporal gyrus    | 8    | -54,-34,-10    |
| R superior lateral occipital    | 2    | 26,-68,50      | R lateral occipital cortex | 5    | 38,-68,32      |
|                                 |      |                | R middle temporal gyrus    | 3    | 36,-58,15      |
|                                 |      |                | L middle frontal gyrus     | 1    | -39,22,39      |
| Executive, negative correlation |      |                |                            |      |                |
| R cerebellum Crus I             | 79   | 48,-74,-30     | No significant clusters    |      |                |
| R paracingulate gyrus           | 34   | 6,40,36        |                            |      |                |
| Executive, positive correlation |      |                |                            |      |                |
| R cerebellum V                  | 22   | 9,-58,-27      | R precuneus                | 2    | 16,-64,40      |
| L cerebellum VIIb               | 1    | -27,-66,-44    |                            |      |                |

Supplementary Table S8: Correlations between ANT effects (normalized RT) and grey matter (GM) and white matter (WM) volume in LBD. All clusters are significant at  $p < 0.001$ , uncorrected. Correction for multiple comparisons was performed using Monte-Carlo simulations with AlphaSim at  $p < 0.05$  resulting in minimum cluster sizes 220 (GM) and 260 (WM) voxels. Clusters surviving multiple comparison correction are highlighted with an asterisk. Locations were estimated from the Harvard-Oxford atlas in FSL and WM regions were identified from the nearest GM structure.

| Grey matter                     |      |                | White matter               |      |                |
|---------------------------------|------|----------------|----------------------------|------|----------------|
| Cluster location                | size | MNI<br>(X,Y,Z) | Cluster location           | size | MNI<br>(X,Y,Z) |
| Alerting, negative correlation  |      |                |                            |      |                |
| L lateral occipital cortex      | 22   | -20,-75,45     | No significant clusters    |      |                |
| Alerting, positive correlation  |      |                |                            |      |                |
| R temporal pole                 | 79   | 18,3,-42       | No significant clusters    |      |                |
| R temporal fusiform             | 16   | 39,-15,-26     |                            |      |                |
| L frontal pole                  | 7    | -9,44,52       |                            |      |                |
| R temporal pole                 | 1    | 22,16,-36      |                            |      |                |
| Orienting, negative correlation |      |                |                            |      |                |
| No significant clusters         |      |                | R lateral occipital cortex | 325* | 24,-58,45      |
|                                 |      |                | L frontal pole             | 34   | -33,39,20      |
|                                 |      |                | R supplementary motor area | 10   | 8,-10,52       |
|                                 |      |                | R inferior temporal gyrus  | 8    | 45,-28,-22     |
|                                 |      |                | L precentral gyrus         | 8    | -8,-14,51      |
|                                 |      |                | R paracingulate gyrus      | 6    | 9,24,44        |
|                                 |      |                | R angular gyrus            | 2    | 50,-46,18      |
| Orienting, positive correlation |      |                |                            |      |                |
| R angular gyrus                 | 126  | 45,-45,20      | R occipital pole           | 4    | 24,-93,15      |
| L parahippocampal gyrus         | 40   | -12,-38,-6     |                            |      |                |
| L precentral gyrus              | 38   | -57,9,2        |                            |      |                |
| R frontal pole                  | 26   | 28,46,34       |                            |      |                |
| R angular gyrus                 | 19   | 62,-52,38      |                            |      |                |
| L insular cortex                | 14   | -44,-4,10      |                            |      |                |
| L frontal pole                  | 7    | -30,36,-20     |                            |      |                |
| L postcentral gyrus             | 7    | -40,-33,50     |                            |      |                |
| R middle frontal gyrus          | 6    | 32,30,30       |                            |      |                |
| R frontal pole                  | 3    | 3,64,6         |                            |      |                |
| R inferior frontal gyrus        | 2    | 52,20,30       |                            |      |                |
| R supramarginal gyrus           | 1    | 50,-30,52      |                            |      |                |
| Executive, negative correlation |      |                |                            |      |                |
| R temporal pole                 | 42   | 39,14,-48      | No significant clusters    |      |                |
| L frontal pole                  | 34   | -51,42,-6      |                            |      |                |
| Executive, positive correlation |      |                |                            |      |                |
| R parahippocampal gyrus         | 5    | 15,2,-27       | No significant clusters    |      |                |
| R temporal pole                 | 2    | 21,10,-46      |                            |      |                |



Supplementary Table S9: Correlations between mean RT and ANT effects (raw RT) and grey matter (GM) and white matter (WM) volume in AD. All clusters are significant at  $p < 0.001$ , uncorrected. Correction for multiple comparisons was performed using Monte-Carlo simulations with AlphaSim at  $p < 0.05$  resulting in minimum cluster sizes of 223 (GM) and 233 (WM) voxels for mean RT and 256 (GM) and 228 (WM) voxels for ANT effects. Clusters surviving multiple comparison correction are highlighted with an asterisk. Locations were estimated from the Harvard-Oxford atlas in FSL and WM regions were identified from the nearest GM structure.

| Grey matter                      |      |                | White matter                  |      |                |
|----------------------------------|------|----------------|-------------------------------|------|----------------|
| Cluster location                 | size | MNI<br>(X,Y,Z) | Cluster location              | size | MNI<br>(X,Y,Z) |
| Mean RT, negative correlation    |      |                |                               |      |                |
| L lingual gyrus                  | 805* | -21,-58,-9     | R inferior frontal gyrus      | 193  | 51,33,8        |
| L angular gyrus                  | 74   | -45,-50,22     | L postcentral gyrus           | 92   | -54,-14,22     |
| L paracingulate gyrus            | 56   | -12,52,-6      | L middle temporal gyrus       | 85   | -56,-36,-14    |
| R cerebellum Crus I              | 43   | 20,-86,-22     | L lateral occipital cortex    | 49   | -33,-69,0      |
| L middle frontal gyrus           | 31   | -34,14,36      | L occipital fusiform<br>gyrus | 41   | -22,-66,-8     |
| L posterior supramarginal        | 30   | -58,-46,30     | R lateral occipital cortex    | 38   | 27,-82,21      |
| L superior lateral occipital     | 14   | 18,-62,50      | L lingual gyrus               | 8    | -12,-72,-8     |
| L cerebellum Crus I              | 13   | -24,-87,-28    | L precentral gyrus            | 8    | -46,-9,28      |
| R occipital pole                 | 9    | 36,-93,9       | R inferior temporal gyrus     | 3    | 57,-36,-21     |
| L superior lateral occipital     | 7    | -18,-69,40     | R frontal pole                | 2    | 45,40,-8       |
| L precuneus                      | 3    | -20,-64,30     |                               |      |                |
| L precuneus                      | 3    | -12,-69,28     |                               |      |                |
| L temporal occipital<br>fusiform | 2    | -46,-58,-20    |                               |      |                |
| Mean RT, positive correlation    |      |                |                               |      |                |
| No significant clusters          |      |                | No significant clusters       |      |                |
| Alerting, negative correlation   |      |                |                               |      |                |
| L anterior supramarginal         | 129  | -51,-27,36     | No significant clusters       |      |                |
| L posterior cingulate            | 26   | -9,-22,44      |                               |      |                |
| R poscentral gyrus               | 20   | 66,-10,14      |                               |      |                |
| L anterior supramarginal         | 14   | -60,-34,45     |                               |      |                |
| L frontal orbital cortex         | 11   | -22,32,-26     |                               |      |                |
| R occipital pole                 | 9    | 26,-87,32      |                               |      |                |
| R inferior frontal gyrus         | 3    | 56,28,20       |                               |      |                |
| L superior parietal lobule       | 3    | -27,-40,51     |                               |      |                |
| Alerting, positive correlation   |      |                |                               |      |                |
| No significant clusters          |      |                | L lateral occipital cortex    | 36   | -38,-64,33     |
| Orienting, negative correlation  |      |                |                               |      |                |
| R frontal pole                   | 7    | 52,39,15       | No significant clusters       |      |                |
| Orienting, positive correlation  |      |                |                               |      |                |
| R occipital pole                 | 74   | 33,-92,20      | R inferior temporal gyrus     | 7    | 56,-39,-18     |
| R lateral occipital cortex       | 47   | 34,-76,39      |                               |      |                |
| L superior lateral occipital     | 23   | -27,-80,32     |                               |      |                |
| R frontal pole                   | 19   | 34,57,22       |                               |      |                |
| R superior lateral occipital     | 16   | 34,-72,20      |                               |      |                |
| R superior lateral occipital     | 15   | 26,-68,50      |                               |      |                |

|                                 |    |            |                     |               |
|---------------------------------|----|------------|---------------------|---------------|
| R posterior middle temporal     | 3  | 69,-26,-12 |                     |               |
| R lingual gyrus                 | 2  | 20,-63,-9  |                     |               |
| Executive, negative correlation |    |            |                     |               |
| R paracingulate gyrus           | 22 | 6,40,34    | L central opercular | 1 -51,-15,18  |
| R cerebellum Crus I             | 20 | 48,-74,-30 |                     |               |
| R cerebellum Crus I             | 11 | 34,-82,-21 |                     |               |
| R frontal pole                  | 1  | 34,40,38   |                     |               |
| Executive, positive correlation |    |            |                     |               |
| R cerebellum V                  | 24 | 8,-57,-27  | L cerebellum VIIIa  | 1 -28,-50,-44 |
| R cerebellum Crus II            | 19 | 32,-63,-42 |                     |               |

Supplementary Table S10: Correlations between mean RT and ANT effects (raw RT) and grey matter (GM) and white matter (WM) volume in LBD. All clusters are significant at  $p < 0.001$ , uncorrected. Correction for multiple comparisons was performed using Monte-Carlo simulations with AlphaSim at  $p < 0.05$  resulting in minimum cluster sizes of 230 (GM) and 257 (WM) voxels for mean RT and 242 (GM) and 262 (WM) voxels for ANT effects. Clusters surviving multiple comparison correction are highlighted with an asterisk. Locations were estimated from the Harvard-Oxford atlas in FSL and WM regions were identified from the nearest GM structure.

| Grey matter                     |      |                | White matter               |      |                |
|---------------------------------|------|----------------|----------------------------|------|----------------|
| Cluster location                | size | MNI<br>(X,Y,Z) | Cluster location           | size | MNI<br>(X,Y,Z) |
| Mean RT, negative correlation   |      |                |                            |      |                |
| No significant clusters         |      |                | No significant clusters    |      |                |
| Mean RT, positive correlation   |      |                |                            |      |                |
| L frontal pole                  | 79   | -24,58,27      | R cerebellum I-IV          | 6    | 9,-48,-21      |
| L superior parietal lobule      | 23   | -44,-40,54     | R temporal fusiform        | 2    | 39,-16,-22     |
| L cerebellum X                  | 7    | -24,-40,-44    | R temporal fusiform        | 1    | 39,-21,-22     |
| R cerebellum V                  | 1    | 4,-56,-12      |                            |      |                |
| Alerting, negative correlation  |      |                |                            |      |                |
| L postcentral gyrus             | 2    | -18,-34,76     | L inferior temporal        | 2    | -54,-48,-16    |
| L lingual gyrus                 | 1    | -20,-75,-3     |                            |      |                |
| Alerting, positive correlation  |      |                |                            |      |                |
| R parahippocampal gyrus         | 120  | 18,3,-42       | No significant clusters    |      |                |
| L frontal pole                  | 21   | -8,44,51       |                            |      |                |
| R posterior temporal fusiform   | 11   | 39,-15,-27     |                            |      |                |
| R posterior cingulate           | 4    | 9,-36,45       |                            |      |                |
| Orienting, negative correlation |      |                |                            |      |                |
| No significant clusters         |      |                | R lateral occipital cortex | 484* | 24,-58,45      |
|                                 |      |                | R paracingulate gyrus      | 159  | 9,22,45        |
|                                 |      |                | R supplementary motor area | 80   | 8,-10,54       |
|                                 |      |                | L supplementary motor area | 80   | -8,-12,54      |
|                                 |      |                | L frontal pole             | 79   | -33,39,18      |
|                                 |      |                | L precuneus                | 74   | -8,-64,46      |
|                                 |      |                | R angular gyrus            | 21   | 50,-46,18      |
|                                 |      |                | R inferior temporal gyrus  | 17   | 45,-28,-22     |
|                                 |      |                | R paracingulate gyrus      | 9    | 9,34,38        |
|                                 |      |                | R precuneus                | 2    | 22,-60,24      |
|                                 |      |                | R middle temporal gyrus    | 2    | 54,-52,-6      |
|                                 |      |                | L supramarginal gyrus      | 1    | -40,-40,39     |
|                                 |      |                | L posterior cingulate      | 1    | -9,-42,42      |
| Orienting, positive correlation |      |                |                            |      |                |
| L parahippocampal gyrus         | 81   | -12,-38,-6     | R occipital pole           | 12   | 24,-93,15      |
| R frontal pole                  | 11   | 30,48,34       |                            |      |                |
| R angular gyrus                 | 11   | 46,-50,27      |                            |      |                |
| R frontal pole                  | 5    | 3,64,6         |                            |      |                |
| L postcentral gyrus             | 1    | -42,-34,51     |                            |      |                |

| Executive, negative correlation |    |            |                         |             |
|---------------------------------|----|------------|-------------------------|-------------|
| R temporal pole                 | 38 | 39,15,-46  | No significant clusters |             |
| Executive, positive correlation |    |            |                         |             |
| R frontal pole                  | 7  | 42,54,18   | R precuneus             | 1 12,-52,62 |
| R cerebellum VIIIb              | 2  | 12,-60,-39 |                         |             |
| L frontal pole                  | 1  | -26,57,27  |                         |             |

## 5 Effect of dopaminergic medication in the LBD group

To study possible effects of dopaminergic medication on ANT effects in the LBD group, the repeated-measures (cue x target) ANOVA was repeated including a covariate for daily levodopa equivalent dose (LED, Tomlinson et al., 2010). This was tested for both raw and normalised RT. For raw RT, there was no interaction between LED and cue ( $F(2,84)=0.15$ ,  $p=0.86$ ) or target ( $F(1,42)=0.003$ ,  $p=0.96$ ). There was a main effect of cue ( $F(2,84)=9.34$ ,  $p<0.001$ ) with post-hoc tests revealing no alerting effect (no cue compared to neutral cue, 95% confidence interval (CI)=[-34.4, 37.5],  $p=1.0$ ), but a significant orienting effect (neutral cue compared to spatial cue, 95% CI=[39.7, 126.4],  $p<0.001$ ). Furthermore, there was a main effect of target with slower RTs in incongruent compared to congruent trials ( $F(1,42)=104.1$ ,  $p<0.001$ ).

For normalised RT, there was no interaction between LED and cue ( $F(2,84)=0.08$ ,  $p=0.92$ ) and no target by LED interaction ( $F(1,42)=0.85$ ,  $p=0.36$ ). There was a main effect of cue ( $F(2,84)=12.20$ ,  $p<0.001$ ) with no alerting effect (95% CI=[-0.02, 0.03],  $p=1.0$ ), but a significant orienting effect (95% CI=[0.03, 0.08],  $p<0.001$ ). There was also a significant main effect of target ( $F(1,42)=224.01$ ,  $p<0.001$ ).

These results are comparable to the results without LED covariate, thus indicating that dopaminergic medication dose does not influence the ANT effects in LBD.

## 6 Analysis of matched dementia subgroups

To ensure that differences in overall cognitive impairment between AD and LBD did not influence the group comparisons, we repeated all statistical analyses for subgroups of AD and LBD patients that were matched in terms of MMSE. To create these groups, four AD patients with MMSE<16 and ten LBD patients (six DLB and four PDD) with MMSE>26 were excluded from the analysis. Supplementary Table S11 show demographic and clinical information about the dementia subgroups. Supplementary Table S12 shows results from the same statistical tests as in Table 2 of the main text when restricting the analysis to the matched subgroups.

Supplementary Table S11: Demographics and clinical information for matched dementia subgroups; mean (standard deviation)

|                         | AD (n=27)               | LBD (n=35)              | Between-group differences       |
|-------------------------|-------------------------|-------------------------|---------------------------------|
| Male: female            | 21:6                    | 29:6                    | $\chi^2=0.25$ , $p=0.62^a$      |
| Age                     | 76.5 (7.9)              | 74.5 (6.7)              | $t_{60}=1.06$ , $p=0.29^b$      |
| AChEI                   | 26                      | 31                      | $\chi^2=1.23$ , $p=0.27^a$      |
| Dopaminergic medication | 0                       | 26                      | $\chi^2=34.54$ ,<br>$p<0.001^a$ |
| Duration                | 3.9 (2.2)               | 3.2 (2.2)               | $U=358$ , $p=0.10^c$            |
| MMSE                    | 21.7 (2.8)              | 22.0 (3.2)              | $t_{60}=0.38$ , $p=0.71^b$      |
| CAMCOG                  | 71.1 (9.9)              | 72.1 (11.5)             | $t_{60}=0.39$ , $p=0.70^b$      |
| UPDRS                   | 2.3 (2.3)               | 21.4 (9.5)              | $t_{60}=10.2$ ,<br>$p<0.001^b$  |
| CAF total               | 0.8 (1.7) <sup>d</sup>  | 5.8 (4.6) <sup>e</sup>  | $t_{58}=5.4$ , $p<0.001^b$      |
| Mayo total              | 8.5 (4.0) <sup>d</sup>  | 15.3 (4.9) <sup>e</sup> | $t_{58}=5.8$ , $p<0.001^b$      |
| Mayo cogn               | 1.6 (1.7) <sup>d</sup>  | 3.4 (1.7) <sup>e</sup>  | $t_{58}=3.9$ , $p<0.001^b$      |
| NPI total               | 7.2 (6.6) <sup>d</sup>  | 14.5 (9.9)              | $t_{59}=3.3$ , $p=0.002^b$      |
| NPI hall                | 0.04 (0.2) <sup>d</sup> | 1.7 (1.8)               | $t_{59}=4.6$ , $p<0.001^b$      |

AChEI, number of patients taking acetylcholinesterase inhibitors; AD, Alzheimer's disease; CAF total, Clinical Assessment of Fluctuations total score; CAMCOG, Cambridge Cognitive Examination; Duration, duration of cognitive symptoms in years; LBD, Lewy body dementia; Mayo Fluctuations, Mayo Fluctuations cognitive subscale; MMSE, Mini Mental State Examination; na, not applicable; Dopaminergic medication, number of patients taking dopaminergic medication; UPDRS, Unified Parkinson's Disease Rating Scale III; NPI, Neuropsychiatric Inventory; NPI hall, NPI hallucination subscore.

<sup>a</sup> Chi-square test AD, LBD; <sup>b</sup> Student's t-test AD, LBD; <sup>c</sup> Mann Whitney U test AD, LBD; <sup>d</sup>N=26, <sup>e</sup>N=35

Supplementary Table S12: Results from statistical tests for raw and normalized reaction times analyzing matched dementia subgroups. Repeated measures (cue x target) ANOVA effects with group (HC, AD, LBD) as between-subject factor (F value, degrees of freedom (df), error df, and p-value), and post-hoc tests (95% confidence interval of the mean difference, Bonferroni-corrected p-value).

|                                    |                   | Effect significance,<br>raw RT | Effect significance,<br>normalized RT |                         |
|------------------------------------|-------------------|--------------------------------|---------------------------------------|-------------------------|
| <b>Main effects</b>                |                   |                                |                                       |                         |
| A) Group                           |                   | F(2,81)=29.6, p<0.001          |                                       |                         |
| Post-hoc                           | HC-AD             | [-557.0, -118.7], p=0.001      |                                       |                         |
|                                    | HC-LBD            | [-857.5, -442.3], p<0.001      |                                       |                         |
|                                    | AD-LBD            | [-507.4, -116.6], p=0.001      |                                       |                         |
| B) Cue                             |                   | F(2,162)=63.3, p<0.001         | F(2,162)=115.9, p<0.001               |                         |
| Post-hoc                           | Alerting          | [-4.2, 37.6], p=0.16           | [0.006, 0.032], p=0.002               |                         |
|                                    | Orienting         | [59.9, 109.1], p<0.001         | [0.073, 0.106], p<0.001               |                         |
| C) Target                          |                   | F(1,81)=440.1, p<0.001         | F(1,81)=978.0, p<0.001                |                         |
| <b>Interactions</b>                |                   |                                |                                       |                         |
| D) Cue x group                     |                   | F(4,162)=2.00, p=0.10          | F(4,162)=8.4, p<0.001                 |                         |
| HC                                 | Cue               |                                | F(2,42)=167.0, p<0.001                |                         |
|                                    | Alerting          |                                | [0.026, 0.068], p<0.001               |                         |
| AD                                 | Orienting         |                                | [0.073, 0.111], p<0.001               |                         |
|                                    | Cue               |                                | F(2,52)=27.3, p<0.001                 |                         |
| LBD                                | Alerting          |                                | [-0.012, 0.037], p=0.62               |                         |
|                                    | Orienting         |                                | [0.044, 0.113], p<0.001               |                         |
| LBD                                | Cue               |                                | F(2,68)=16.4, p<0.001                 |                         |
|                                    | Alerting          |                                | [-0.025, 0.020], p=1.0                |                         |
| LBD                                | Orienting         |                                | [0.024, 0.078], p<0.001               |                         |
|                                    | E) Target x group |                                | F(2,81)=6.4, p=0.003                  | F(2,81)=3.10, p=0.051   |
| HC                                 | Executive         | F(1,21)=111.68, p<0.001        | F(1,21)=227.05, p<0.001               |                         |
| AD                                 | Executive         | F(1,26)=187.8, p<0.001         | F(1,26)=428.5, p<0.001                |                         |
| LBD                                | Executive         | F(1,34)=194.6, p<0.001         | F(1,34)=361.2, p<0.001                |                         |
| F) Cue x target                    |                   | F(1.6,132.9)=4.7, p=0.01       | F(1.9,150.5)=10.7, p<0.001            |                         |
| G) Cue x target x group            |                   | F(3.3,132.9)=1.1, p=0.37       | F(3.7,150.4)=1.39, p=0.24             |                         |
| <b>Magnitude group differences</b> |                   |                                |                                       |                         |
| H) alerting                        | ANOVA             | F(2,81)=3.58, p=0.03           | F(2,81)=7.0, p=0.002                  |                         |
|                                    | HC-AD             | [-21.5,86.5], p=0.44           | [0.000, 0.068], p=0.047               |                         |
|                                    | Post-hoc          | HC-LBD                         | [4.8,107.1], p=0.03                   | [0.017, 0.081], p=0.001 |
|                                    | AD-LBD            | [-24.7,71.7], p=0.71           | [-0.016, 0.045], p=0.72               |                         |
| I) orienting                       |                   | ANOVA                          | F(2,81)=0.15, p=0.87                  | F(2,81)=3.0, p=0.055    |
| J) executive                       | ANOVA             | F(2,81)=6.4, p=0.003           | F(2,81)=3.1, p=0.051                  |                         |
|                                    | HC-AD             | [-341.6, -29.7], p=0.01        | [-0.120, 0.039], p=0.65               |                         |
|                                    | Post-hoc          | HC-LBD                         | [-353.3, -57.7], p=0.003              | [-0.044, 0.107], p=0.93 |
|                                    | AD-LBD            | [-159.0, 119.3], p=1.0         | [0.001, 0.143], p=0.05                |                         |

AD, Alzheimer's disease; HC, healthy controls; LBD, Lewy body dementia; RT, reaction time

## 7 Supplementary references

Tomlinson, C. L., Stowe, R., Patel, S., Rick, C., Gray, R., and Clarke, C. E. (2010). Systematic review of levodopa dose equivalency reporting in Parkinson's disease. *Mov. Disord.* 25, 2649–2653. doi:10.1002/mds.23429.
